# Supplementary material for: Generation of a rod-specific NRL reporter line in human pluripotent stem cells
Source: PubMed Central journal article supplement (PMC5799252; doi:10.1038/s41598-018-20813-3), 2018-02-05
Supplement: 41598_2018_20813_MOESM1_ESM.pdf [file 41598_2018_20813_MOESM1_ESM.pdf]

## Supplemental Information

### Title

Generation of a rod-specific NRL reporter line in human pluripotent stem cells.

### Authors/Affiliations

M. Joseph Phillips<sup>1, 2,+</sup>, Elizabeth E. Capowski<sup>1,+</sup>, Andrew Petersen<sup>1</sup>, Alex D. Jansen<sup>1</sup>, Katherine Barlow<sup>1</sup>, Kimberly L Edwards<sup>1</sup>, David M. Gamm<sup>1,2,3,\*</sup>

1. Waisman Center, University of Wisconsin-Madison, Madison WI, USA

2. McPherson Eye Research Institute, University of Wisconsin-Madison, Madison WI, USA

3. Department of Ophthalmology and Visual Sciences, University of Wisconsin-Madison, Madison WI, USA

<sup>+</sup>MJP and EEC contributed equally to this work and are co-first authors

<sup>\*</sup>Corresponding author

**Supplemental Table 1. Primers.**

|                                  |                                   |
|----------------------------------|-----------------------------------|
| <b>Cloning primers</b>           |                                   |
| NRL 5' arm F -KpnI               | GAGAGGTACCAAGGGAAAACGGGTCAGAAGGG  |
| NRL 5' arm R-Sall                | GAGAGTCGACTCTGGAGCTGGGCTGGGAGG    |
| NRL 3' arm F-BamHI               | GAGAGGATCCCCCTCTGAGGGCCGACCTGG    |
| NRL 3' arm R-NotI                | GAGAGCGGCCGCGCTGCGTTTTCCCTGTCCTGA |
| eGFP-Sall F                      | GAGAGTCGACATGGTGAGCAAGGGCGAGGAG   |
| eGFP-polyA-MfeI R                | GAGACAATTGGGAGATCCCTCGACCTGCAG    |
| <b>Site directed mutagenesis</b> |                                   |
| SDM-F                            | ATGGTGAGCAAGGGCGAG                |
| SDM-R                            | TCTGGAGCTGGGCTGGGA                |
| gRNAs                            |                                   |
| NRL sgRNA 1A                     | TGACATATTCCATGGCCAGG              |
| NRL sgRNA 1B                     | GTAAAGCGGGAACCCTCTGA              |
| <b>Genotyping primers</b>        |                                   |
| NRL genotyping -F                | TGTTACAAAGTCTAACTGCCC             |
| eGFP-R                           | GGTGGTGAGATGAACTTCAGG             |
| NRL 5'-F                         | CACCATCCCTCTGGCTTTCC              |
| NRL 3'-R                         | GCAGGGTAGCCAGCCAGTAC              |
| <b>Copy number qPCR primers</b>  |                                   |
| eGFP-F                           | AGCTAAACGGCCACAAGTTC              |
| eGFP-R                           | AAGTCGTGCTGCTTCATGTG              |
| NRL exon 3 qPCR-F                | TGTCACCCTGAGCAAATCAG              |
| NRL exon 3 qPCR-R                | TTGTCTGGGGACTTCTTGG               |
| <b>Off target primers</b>        |                                   |
| NRL sgRNA 1A OT1 F               | TCGCCATCCAGTACAGATCC              |
| NRL sgRNA 1A OT1 R               | CCAGAAACAGGAACGCACGA              |

|                     |                           |
|---------------------|---------------------------|
| NRL sgRNA 1A OT3 F  | ATTCGTGGTGTCCAGAGGCTA     |
| NRL sgRNA 1A OT3 R  | TGGCATCGTAAGTGCAAATGA     |
| NRL sgRNA 1A OT4 F  | AGAAGAATGCCACGTCCTG       |
| NRL sgRNA 1A OT4 R  | CCCTCTCCAGAGTCCTCGAA      |
| NRL sgRNA 1A OT5 F  | ACCGGGTGCTCCCAGAATTA      |
| NRL sgRNA 1A OT5 R  | GCCAACACCGACAAGTTTGG      |
| NRL sgRNA 1A OT7 F  | ACATTGCTGTGGGCGATACA      |
| NRL sgRNA 1A OT7 R  | GAGAATTGGGAGCAGTGCCT      |
| NRL sgRNA 1B OT1 F  | AGGTCAGCCTCTCAGCGAT       |
| NRL sgRNA 1B OT1 R  | TAATTCGGTCCAGACCTCGC      |
| NRL sgRNA 1B OT2 F  | GAATGGTTCATCAGGCCCA       |
| NRL sgRNA 1B OT2 R  | TCCCAAGTTGCTGACATCCC      |
| NRL sgRNA 1B OT3 F  | GGAAATCTAAGGGTACTGTAGGG   |
| NRL sgRNA 1B OT3 R  | CAACCCACGGAAAGACACATC     |
| NRL sgRNA 1B OT4 F  | GCCTTAGCCAATTTGCTCATAAATC |
| NRL sgRNA 1B OT4 R  | AGGATGTTGGCCTTTGCAGC      |
| NRL sgRNA 1B OT5 F  | TCCGTTCCATCTTTTGCGGA      |
| NRL sgRNA 1B OT5 R  | AGGGGTCAGTCAGTACGTCA      |
| NRL sgRNA 1B OT6 F  | CTCTGCTAGCCACCGTTCTC      |
| NRL sgRNA 1B OT6 R  | GTTTGGAGGATGGGGTCTGG      |
| NRL sgRNA 1B OT7 F  | GGTGCAGGAGAGCTTGTGG       |
| NRL sgRNA 1B OT7 R  | GAAGTTGCGACACAGAGGGA      |
| NRL sgRNA 1B OT8 F  | GAGTTGCCTGGAGGAAGCTAA     |
| NRL sgRNA 1B OT8 R  | AGTTTGCAATACTCTCTCAAAGCA  |
| NRL sgRNA 1B OT9 F  | AGCTGAGGAGGGTACTGAGG      |
| NRL sgRNA 1B OT9 R  | ACACTCTGCTGCTCTGCTTC      |
| NRL sgRNA 1B OT10 F | CCTTCAATGCCTCTCCGTGT      |

|                     |                      |
|---------------------|----------------------|
| NRL sgRNA 1B OT10 R | CTTTTGGCCTTGCTGTGACC |
|---------------------|----------------------|

**Supplemental Table 2. Off target sequences.**

| sgRNA1A    |        |          |                         |              |          |          |              |
|------------|--------|----------|-------------------------|--------------|----------|----------|--------------|
| chromosome | strand | position | sequence                | n_mismatches | score    | ontarget | gene         |
| chr14      | 1      | 24552017 | TGACATATTCCATGGCCAGGGGG | 0            | 100      | True     | NM_006177    |
| chr20      | 1      | 39317426 | TGACATACTCCATGGCCAGCGGG | 2            | 4.214362 | False    | NM_005461    |
| chr5       | 1      | 26555853 | TTCATATTCTATGGCCAGGGAG  | 3            | 1.500342 | False    | None         |
| chr15      | 1      | 99428977 | TGAAATATTGTATGGCCAGGTGG | 3            | 1.332228 | False    | None         |
| chr6       | -1     | 1.36E+08 | AGAGATATTCCAAGGCCAGGCAG | 3            | 1.150704 | False    | None         |
| chr6       | 1      | 12088422 | TTACATCTCCATGGCCAGTGAG  | 3            | 1.019098 | False    | None         |
| chr15      | -1     | 99563969 | TGACAACCTCCATGGCCAGGTAG | 3            | 0.958618 | False    | None         |
| chr2       | 1      | 1.4E+08  | TGTCATATTTCAAGGCCAAGGAG | 3            | 0.958556 | False    | None         |
| chr3       | -1     | 46932745 | TCACCTTCTCCATGGCCAGGAGG | 4            | 0.932256 | False    | None         |
| chr17      | -1     | 74383417 | TGCCCTTCTCCATGGCCAGGAAG | 4            | 0.905329 | False    | NM_001142601 |
| chr16      | -1     | 68573852 | TGGGGTTTTCCATGGCCAGGAGG | 4            | 0.891867 | False    | None         |
| sgRNA1B    |        |          |                         |              |          |          |              |
| chromosome | strand | position | sequence                | n_mismatches | score    | ontarget | gene         |
| chr14      | -1     | 24551968 | GTAAAGCGGGAACCTCTGAGGG  | 0            | 100      | True     | NM_006177    |
| chr8       | -1     | 22398127 | CTGAAGCGAGAACCCTCTGATGG | 3            | 1.609912 | False    | NM_001243974 |
| chr11      | 1      | 1.13E+08 | CTATTGCTGGAACCTCTGATAG  | 4            | 1.386187 | False    | None         |
| chr3       | 1      | 72786510 | GAGAGGCAGGAACCTCTGAAGG  | 4            | 1.345833 | False    | None         |
| chr10      | 1      | 92490398 | CTAAAGAGGGAACCTCTGGGAG  | 3            | 1.054856 | False    | None         |
| chrX       | -1     | 1.5E+08  | GGAAAGTGGGAACCTCTGGAAG  | 3            | 1.019098 | False    | None         |
| chr1       | 1      | 6113546  | GCCGAGGGGGAACCTCTGAGAG  | 4            | 0.905329 | False    | None         |
| chrX       | 1      | 55306856 | CGAAAACCTGGAACCTCTGAGAG | 4            | 0.838643 | False    | None         |
| chr6       | 1      | 62641171 | ATAAATCCGTAACCTCTGAAGG  | 4            | 0.797206 | False    | None         |
| chr10      | 1      | 19062244 | GTCAAGCCTCAACCTCTGACAG  | 4            | 0.76913  | False    | None         |
| chr8       | -1     | 52335592 | ATATAGCTGGAACCTCTGCAGG  | 4            | 0.710795 | False    | None         |

**Supplemental Table 3.** Primary antibodies used for immunocytochemistry.

| <b>Antibody</b> | <b>Host</b> | <b>Catalog #</b> | <b>Company</b>           |
|-----------------|-------------|------------------|--------------------------|
| ARR3            | Goat        | NBP1-37003       | Novus                    |
| CRX             | Mouse       | h00001406-m02    | Abnova                   |
| eGFP            | Mouse       | MB3580           | Millipore                |
| eGFP            | Rabbit      | A11122           | Thermo Fisher Scientific |
| KI67            | Rabbit      | sc-15402         | Santa Cruz BioTechnology |
| NR2E3           | Mouse       | ab41922          | AbCam                    |
| NRL             | Goat        | AF2945           | R&D                      |
| OPN1MW/LW       | Rabbit      | AB5405           | Millipore                |
| OPN1SW          | Rabbit      | AB5407           | Millipore                |
| PKC $\alpha$    | Rabbit      | AB32376          | Abcam                    |
| RHO             | Mouse       | MABN5356         | Millipore                |
| SNCG            | Mouse       | H00006623-M01    | Abnova                   |
| VGLUT1          | Guinea Pig  | AB5905           | Millipore                |
| VSX2            | Sheep       | X1179P           | Exalpha                  |

Full-length gel from Figure 1, panels C and D.

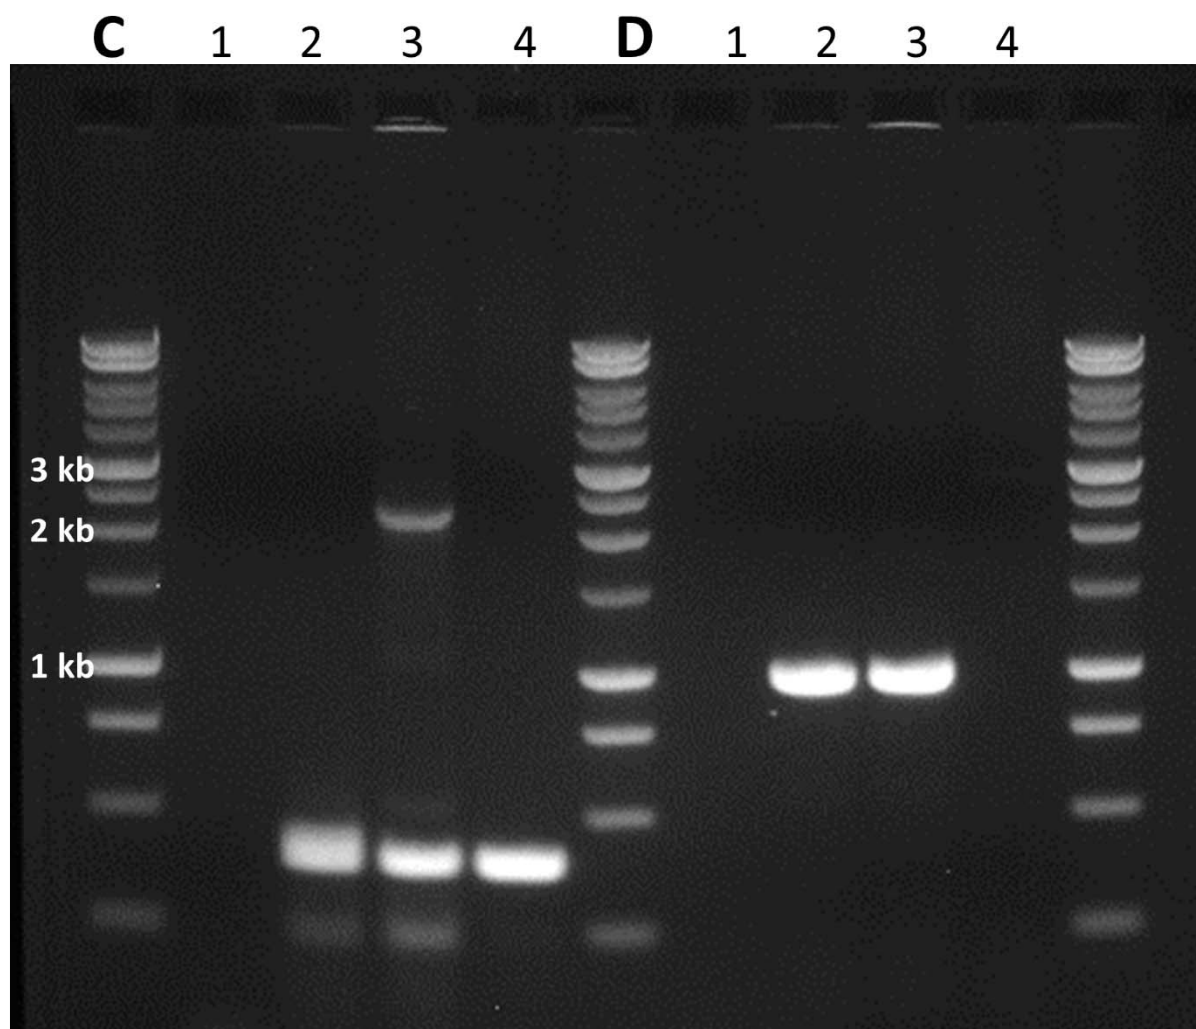

**Off target amplicons for sgRNA 1A and sgRNA 1B.** 10 off target sites for each sgRNA were sequenced and no indels were detected. The off-target sequence is noted with brackets.

sgRNA 1A

Off target site 1: NC\_000020.11: 40688583-40689751 Homo sapiens chromosome 20, GRCh38.p7  
Primary Assembly

```
TCGCCATCCAGTACAGATCCTCGAGGTGTGTCTTCTGTTCCGGTCGGGCTGAAGCTGGGCGACGAGGGCACGGAGC
TACACGGAGTGCTGAGCGGTGTGGAGGACACCGAGCCGGCTGGCTGCAGGCGTGTGCAGGGCCTGCCCCGACG
CTCCGCGCGCCCCAGTGGCTCCTTCTTACGTCAACTTGAGCAGTCAAGTCGT[TGACATACTCCATGGCCAGC
GGG]CTGGTGGGCAGCTCTGGCCCCATGCTCAGCTCCGCGGCCATCGCTGAAGCGAGGCGCAGCCGCCGCTGCCG
CCCGGGAAACTTTGCGGCCGGCCGGAGCGCGCCGAGCCAAGCGCGGGGGGAAGAGCGGAGAAGAGCTGGGG
AGGCGGGGAGCGAGGGCGCAGCGGGCCGGGGCCGGCCGCAAGCCTTGTCTGGGGACGCGGCGGCGCGCCG
GAGAGTCCCGAGGCTGCCTGCACCGCCCCAGAGCTCTGGGCTGTGCCCGCGCAGGGACCGGGCCGGGTAGAGTC
GGGCGGGGTGGAGAGGCAAGCGGAGCGCGCGGTGGGGCTGAGGGGAGGCGTGGGGCGAGTGCCCGTTGCTCG
CTCTCTAGCTCTTGTCTTACGCTCTCTCGCTCGCAGCCGCTCGCAGCTCGGCGGTGCAGCTGTGCTGGATCCGG
CGGCGCCGAGCCTTTATCGCCTCCTGATGTCACTGGGGTGCGGGGGCCCGGGCGGCCCGGTGCGCGGGCCAA
TAGCTGCACGGCCTCCGCGGCCAGCGGCGCAGGGCGGGGCGCGCCTGACAGCTCCCCCGCCCCCGCGTCAGCT
GACTGGCGGCCCGAGCGGCCCGGAGCGGCGGAGGCCTGGCGGAGCGCTGGAGCGGAGTGGGACGGCCAGCC
TGGGCCACCCCGTACCCTGCAGGTCCCGGCCACGCACGCTCGCCTGGAGTGCGCGCCCCACCTTAGGCCAA
ATCACCGCTTCCCCTCCTCGCGCACTCTCCTCCCTCAGTTCCTTTGCACCCACCCCATCCCGTGTACCCCCAAG
GAGGCTCAGAATGAGCGCCGGGACAACGCCTCCTGGGCCCTTGTCCCAAGCGGCCCGCCAGTGGGCGACG
CTCTGTGTCTCTCGCGGCTTCTGGCCGTGTGTGTCGTGCGTTCCTGTTTCTGG
```

sgRNA 1A

Off target site 2: NC\_000005.10: 26555045-26556014 Homo sapiens chromosome 5, GRCh38.p7  
Primary Assembly

ATTCGTGGTGTCCAGAGGCTAGCAGTTCTGGTAAGAATAAAGTAGTTTCTCCTTATCCATGAAGGATACATTCCAA  
GATCACCAGTGGATGCTTGAAGCCATGGGGAGTACAAAACCTATGTACATCATGATTTTTCTATAAATACATACCT  
ATAATAATGTTTAAATTGATAAATTAGGAACATTAAGATATTTACAATAACTAATAATAAAATAGAACAATATAACAA  
TAGCCTATAATAGTATTTGTGTTTCATATAGTCTCTCTCTCAAAATATCTTGTACTGTGCTGATTTATTTTTGCACCACA  
CTTGACCATGGGTAAGTGCAAAACCTGTGGATAAAGGTGGAGTACTGCATTCTTAATTTGAAAATGTATTTTCATATA  
AATGCATAGAGTAATTTAAACAACCTAGTATTATTAATAAACTAAGCTAACAATTTTTCTTTCAAAAAAAGCATCAGCAC  
AGAAACAACCTGAAATTTTTGAAAACCTAATTCAATTTGTGCTATTATATACAGTATTTACTGGATGTACACACGTGTG  
GATGCGCACATGTGCACACACAAACACACACATGGGAAATCTTCCACATTACAAAAAGGAATATCAAGAGCCATT  
GGAGCACTTGATCTTTGATGACATCAACCTCTTCGGCTAATAATTTCTCCAGAAAGGTCTTGACTTTCTGATTTCTT  
TTTTGTT[TCTCATATTCTATGGCCAGGGAG]TCTCACTCTCTAACTCCATTTTTATTTTCTAATTCTGTTGCATTGAA  
TGTCTGTTCAATAAGTGTGTTCTCCGGGTTTCATATCATTGGTTCTTCTCTCAAGCTTCTATGGCTCTGAGATAGAA  
TATATTTCTTCCACATCTGTGGTCTCATAGAATAGTAAAAATAACTCTCCTGCAATCCTTACTAAGAATAATGTCCAT  
GTTTATTTTCACTTTTAGGCATATCATTGCACTTACGATGCCA



sgRNA 1A

Off target site 3: NC\_000015.10: 98885303-98886249 Homo sapiens chromosome 15, GRCh38.p7  
Primary Assembly

AGAAGAATGCCACGTCCTGGGTGGACTTCTGTTCCGGCCTGGGGCAGGACGCTGCATGTCAGTTCACCTAGAGCC  
CCTCGCTTGCCCTCACCCCTCTCCCTTTCTTCTCCTCCCGTGTTGTCTCATGGTCAGTTCCTCTCCTGGCAAGGCAA  
GAGAATCATAAAATCTCTTTGGACCATGTGTCTCTGATGCACTTTGGAGGTTGAAGCTCACTTTCGTGAAGTTAG  
GAGCGGTTAATCCTCCTGCACGAGGATGCATGCCTGCTAGGGAAAGCCTCCCTGCGTTTATATGGAACAGTGGTG  
TGTACCTTAGGGCAACCCAGAAACAGCTGAGATGGCCCTAAACTCTTCCGTATTTTGATTGAGAAGCTTTACCTTAT  
TTGAACATCTGCAGAATAAGTTCTTTCTTTAGAAATGATTGGGGATAAAATTGTTTGCATTA[TGAAATATTGTAT  
GGCCAGGTGG]CCCCTCTTTCATGTTTTGTTCCCTGTGAAGAGGTTGAGTCTCCTATTTTTTTTTTTTTTTTGGAGATA  
GAGTTTTGTTCTTGTCCCTCAGGCTGGAGTAAATGGTGCAATCTTGGCTCACTGCAACCTCCGCCTCCTGGGTTCA  
AACGATTCTCCTGCCTCAGCCTCCAAGTAGCTGGGATCACAGGCACGTGCCACCACACCTGGCTAATTTTTGTATT  
TTTAGTAAGAGATGGGGTTTCGCCATGTTGGGCAGGCTGGTCTTGAACCTCCTGACCTCAGTTGATCTGCCCCCTC  
GGCCTCCCAAAGTGCTGGGATCACAGGCGTGAGCCACCACGCCAGCCTATGGTATGCTTTTAAAAATGGTTTCTC  
TGCACTAATGATTATTTAAAAAAAACCTCTGGCAAGAACAAAAACAAATGGTTTTTTAAAAACTCTAGAAATAAT  
TTGATACATTCGAGGACTCTGGAGAGGG

sgRNA 1A

Off target site 4: NC\_000006.12: 136010901-136011617 Homo sapiens chromosome 6, GRCh38.p7  
Primary Assembly

ACCGGGTGCTCCCAGAATTACTGCAAGGGAGGTTTCATTACCTGGGATTATACTTCATGCCGTGTGGGAAATTACA  
TGCTCTCTAGTCAACTGTTGACATTACCAAGACCCTCAGCCTTGGAGATTTACATTTTACTCACACCTCAGACATAG  
ACACAAGCTGGGGTTCATTTGTTTGTCTTTACTTTTTTCAGATGTTGGATGAAAAAAGAGATTCTTAATAATGGGTTTT  
CACTTCTAACTCCCCCTTTCTCCCCATCAAAAAACAAAACAAAACAAAACAAACCTCAAAAGACTTTATTTTCCTTT  
CCCTTTCTTTATAGCAGAGATCAGGGTATCAGGGTATCAAGAGAGCAGGGTATCAGGCTGCTCTCTTATCCAAATG  
GCAATACTCAAAGGTTCCCAAGATTTAGTCACCTCCCTTCTCAAGTGAATATAAAACGTGGAGCATCTTTCTTTGCA  
GAGTAAGACTGACTTTAGGTCATCTTGAGCCATTTATCATTATTTGAAACATTATAGAATCTATTGGATCATATAG  
CCAAAGTTATAGAAAATATAATTTTCATTTTAAACAGATCTCTTATTATGAATGGTACTTGGG[CTGCCTGGCCTT  
GGAATATCTCT]TTTGCATGATTGCAATATACTTGTGTCCAAATGTGGATCTTGGCCTCTTAAGTAATGTTCTCACAT  
TTACCCAACTTGTCGGTGTGGC

sgRNA 1A

Off target site 5: NC\_000006.12: 12087892-12088555 Homo sapiens chromosome 6, GRCh38.p7  
Primary Assembly

ACATTGCTGTGGGCGATACATTTATCAGGATGAAAATTTAGTTATTTTTGACTATTGTTGAGATGTAATG

TCCTATATTTCAAAGCTAGCTTGCTTCCTTTGTTCTGTTCTCCCACTTTGCCTTGGCAAGTTGGATCAATATGCAATTG  
AAAGACGTTTGATCTGTAAATAGAAGGTTCTCTGAATTTCTTGGCCTTTCTGGCAAGATAGGGAGAGAGGCAGGT  
AGATCAGAGTTTGAAGGGCCCATGGTGTGCGGTGTCTGCCTTTTATTTATTTGGAGTAGGATACCATATTGGAGG[  
TTACATCTCCATGGCCAGTGAG]CAGCGGTAGGGTCAGCATTGGAGACAACCTTCTGAGCTGATGCGTTTATTTAA  
ATTGTACTTACACATTTGGGATATGTAGAATGTTATATAATTATCAATATTGTCTTCAGTTCAGTACAAAATAGTACC  
CTGGGAATTTGTTCTTTTGCCATTTAATAAGTACCTAGACCAGTGTGTTAAATTTGGAATCGATTACTGCCCATGT  
CATGAAGTATGTATATCCTTATAAAGTTTAAATTAATTATTATTGAAATAGAGCATGCACATATTTACAAAATCCAG  
TTGTGCCCAGAGCCCCAGGTCAAAGAACAGCAGGAGCAAGGCACTGCTCCCAATTCTC

sgRNA 1A

Off target site 6: NC\_000015.10: 99020565..99021246 Homo sapiens chromosome 15, GRCh38.p7  
Primary Assembly

GTGTCTGTAGGGGAACGTGGACCCAGCACGTCTGGGATTCAGTTCTTGGGGAGCAGGGTCTCGCTGGGGACCAT  
GGGCAGGGACTGGGCTGGATATTTGGACTCATAAACAAGTCCACAGACTATTCCCATTCTTCATCAGTGTGAAAGG  
AAAGGATGAGGTGGCCTCTGAAAGT[CTACCTGGCCATGGAGGTTGTCA]GTTACTTCTCACCCAAGCAGATAGTA  
TAGTCTATCTGCTGTAGGAAAGTTTGCTAGGAGGGATTTTTTTGTGATTGGGTGTATCGACGAGCTGGCTTGCCAC  
CACCTGGCCAGGGCTCTGGGCAGCCCATCCCCTAGAATGTCTTTCCAGGGGTCCTGTTCTTCTGGGAGGGCCGG  
GTCCACAGTGAGTCCCCTGATGGCCAAGGCGTCTGTATTTCCATCTTCTGTTGTGATTCTTGCCATGTAGTGGCA  
TCTACACTAGAGATGGCTCTTATCACCCCTTTCTACACATCAGGGGCTGTAGGATATCTGTATGAAATGGGATCTC  
CACAGCATAAGATGGCTGGTGTCTGTCCCTCTCCACATGGGTCCTGCCATGGCCTGGCAGGACAGAGTGAATGA  
CCAGACTTGGATAGGGTGGTGGCAGGGCAGTGGATGCTGAGTGTGCGTTTTGAACTTTGAAGCCCTAGTCTGG  
CG

sgRNA 1A

Off target site 7: NC\_000002.12: 139531402-139532229 Homo sapiens chromosome 2, GRCh38.p7  
Primary Assembly

ACAGAATGACTCAGCACCGTTTATGAATGATTATAATGAGTTGGGGTAAAGAGAGGTAACAGACATGGGGAAAA  
AGATGACACACGATGATAAGAAGTGCAAGCAGCATTCTAAAATTCAGTTCACATCTTCAAACCTCTGAGTTCAAGAT  
GCTTCCACTGTACCATGTGGTCCCTATCACTGAGTTCTATAGCATGTTTTCTATGTTTTAAAGCAAAAAGTTTCTCT  
GGTTTGCCTCCTCAAATTGTCCAACAAAAATATATATTGAAAACCTCTCAGATTTGCTACACATCACTTGTGAAAAA  
TTGCTTAAGAAATAATTCCTCAACTCATTCAAGTTTCATTAATTTTGCCTTTGAAGGATGGAAGAATATATCTTTCTA  
GCAAAAATCGGATTTGTGCATGACAGCTACTTGAGCTCAGAGGTCAAAGAATGAATTTGGGCTGCCTCCCTGCATT  
CCCATCCCTTCAATCTTTTGTGCTTCCACAGCAGGTAGGATTTGAAAGAGATTCTGCCCTTGCTAGAAGAAAAA  
AAAATTGTAAGGTAGAAAATAATCAAACCTTGGCTTGAGAGGAGCCAAAATGAATGCCGTTCCAATACTAATGT  
AAACCTTCTACCAATACTTAGGATTTACAAAAAATTTCAAAG[TGTCATATTCATGGCCAAGGAG]ACCTAGTAT  
GGTGGCGATGTATGCTATGCTTATGCCTGGGAATAGAGTAAGAGGTTAGGAAGATCAGGAGATAAATTTTCAAG  
GAAAAAATCTGAAAAAAGATTGGCATTTCACAAATGTGTGAAAGGGAATGCAGACAGATAAACCT

sgRNA 1A

Off target site 8: NC\_000003.12: 46891087-46892009 Homo sapiens chromosome 3, GRCh38.p7 Primary Assembly

CTTGTTGCAATGGCTGTGCTAACAGATAAATAGGTCCTAAAGTTCAGGGAGGCCAGAGGTGGGGCCACCACCCT  
ATGGATGAATGAAGGAGTGTGGGAGTCATGCGTGCTGGAAGCACATATCTTCCCTCCTGAACATCCCACTCC  
AGAAAAAGGGGTGTGCCT[CCTCCTGGCCATGGAGAAGGTGA]AGCCAACAGCTGGAGGTAGAGGCTGAGCCAAT  
TCCTTGAGCCAGTGAGGGGTGTGTTGGTCAGCTTTCGGTGGTCAGGCTGCCAATGGCCACTCAGTTTTCAACCA  
TGACTGCCTGCCTGCAGTCTAGGCCATCAGGGGTGACCCCCAGTCATATCAGTAGGCTGGTCTGTCTGTTGGGAG  
GCCCAGGGAGTCAGCAAGTCTCTAAGGATGTGTGGGAGCCTCCGTCAGTCACTCCAGAGCTCTCCATCAGCTGGA  
GAAAATACAGCACAAATGGGTTTGTCTTGAGAGGGGTGGAGGTGGCAGAAGAAGAAGGATAGTGGGGAGGGGG  
TAAGACAACAAGATGGCAAAGGCAGTGTAGATGGTAGTTGTTGGGCAGGTGGCAGTATTGCTGATGGTGCTAAT  
GTTGCCTTGGTGATGCTGGAGGTGGTGGCAGTGGTGTGGTGTGGTGTGATGTACCAGTTGTGATGGTGCAGATG  
GTGGTGATGGTGGTTATATGGATGGTTACAGTAGTGCTCATGGTGGTAACGGTGATGCCAGTGGTGGTGGTGGT  
AGTACTGGGAGGGACTGGTGTGCTGGTGTGGTGTAGTGACAGTAATGATGGTTATTGATGGAGGTACTAGCA  
GCAACGATGGAAATGGTAGTTAATGGGTGCTGTAAATGGAGTGAGGTGGACAGGGATCAGCCCCCTCACCAGCA  
TGGATCCCCCATGTCAGAGGCACAGGGAGA

sgRNA 1A

Off target site 9: NC\_000017.11: 76386803-76387585 Homo sapiens chromosome 17, GRCh38.p7  
Primary Assembly

CAGCTATGAGCAGGTCACCAATGAAGACCTCCTGACCAACTGCACGCTATTGCTGTGCCCGGGCTGCTGTCACCC  
ATGAACCTGCTGTCTCTGCACACGGCTTCGGGGCTGCGCCTCTTCTCTGTGCTCAGCCTGGCCTGGGGCTTCATTGC  
TGATGTGGACCTAGAGAGTGAGAAGTATCGGCGTCTGGGGGAGATGCGCTTCACTCTGGGCACCTCCTGCGTCT  
GGCAGCCCTGCGCACCTACCGCGCCGACTGGCCTACCTCCCTGTAGGAAGAGTGGGTTCCAAGACACCTGCCTC  
CCCCGTTGTGGTCCAGCAGGGCCCGGTAGATGCACACCTTGTGCCACTGGAGGAGCCAGTGCCCTCTCACTGGAC  
AGTGGTGCCCGACGAGGACTTTGTGCTAGTCCTGGCACTGCTGCACTCGCACCTGGGCAGTGAGATGTTTGCTGC  
ACCCATGGGCCGCTGTGCAGCTGGCGTCATGCATCTGTTCTACGTGCGGGCGGGAGTGTCTCGTGCCATGCTGCT  
GCGCCT[CTTCCTGGCCATGGAGAAGGGCA]GGCATATGGAGTATGAATGCCCCTACTTGGTATATGTGCCCGTGG  
TCGCCTCCGCTTGGAGCCCAAGGATGGGAAAGGTGTGTTTGCAGTGGATGGGGAATTGATGGTTAGCGAGGCC  
GTGCAGGGCCAGGTGCACCCAACTACTTCTGGATGGTCAGCGGTTGCGTGGAGCCCCCGCCAGCTGGAAGCCC  
CAGCAGATGCCACCGCCAGAAGAGCCCTTATG

sgRNA 1A

Off target site 10: NC\_000016.10: 68539589..68540304 Homo sapiens chromosome 16, GRCh38.p7  
Primary Assembly

```
CCGCTGAGCCTTTCATTCGGGGATGGGGAGCGGCAGGCCCGGGCTGGTTCCACGGTCCTCGCCACCATCTCCCCT
GGAGATGTGGTTTAGGGGCGGAGGTGGGGCGGGGCGGGGCGGGGTGGGGTCGGTGTTCAGCGGGGTGAGT
GGGCCCTGTCCTTCTCCCCAGCTCCTGCCCCGAGCCGGGCCCTGGCGAGGCAGGAATGGCCCCGAGGCCTCCG
ACCGCCGCGCCCCAGGTGAGCAACGCGTTCCTAACCTCCTGGGCATCCCATCCATCTATCCATCCCATCTCCAAGG
GTGTTTGGAGCAGTCATTGTTCTCTGCCTGGCGACTCCCTTACTTGCTTGGCTCGATCGGAG[CCTCCTGGCCATGG
AAAACCCCA]GGCTTTGGGGAGCTGGATTCCCAAAGGGGAGGCTGCTCTGTGGGGTAGAGAGGGCCAGTGTGGT
GCGATCTTGTGGGAGGAGTTGAGATTGGATGCGTTGGGAAGTGTGAGTTTTGAGAGTCCTGAATGCCACGCCAGT
TTTTGAACTCTTGTCAATAAGAAATGGAGAGAGTGGGGTACAGGATGGAACACTGTAGAGGAGGAAGTGACT
GTCGGCAAGTGTGGAGAGAGGAGCCCCAGCTTCTGACCCAGGGCCCATAGAGAGTCCGTAAGGGGCCGTAGAA
GCCTGGTTAGAACATGTCTAGGAAGAGGCTGGAGATGGGCTTTCTT
```



sgRNA 1B

Off target site 1: NC\_000008.11: 22539844-22540683 Homo sapiens chromosome 8, GRCh38.p7  
Primary Assembly

AGGTCAGCCTCTTCAGCGATTCTAAAAGATTTCAAGAGCAGAGGCAGAAGTAGACTGGAATTTAGTTCAATTCATT  
TCTGAGGTTGCCCTAAGGTAGGCAAGTTAAATTAACCTTTGTTTCTATGAAAACCATTGGAAGCTGATAAACTTGTATT  
ATACTTGTAATTGTTTTATTAGGTAAGATGGTTCAAACGCGAATGCCTTAACCTGGTGTATAAAAGTTGAATCGG  
AAGGAAAATATGTAGAAGCTATTTTTAAGTTTTTAACCTTATGTACAGCTCCTGGTTGTGCAAGATAGAAAGCTGTC  
CTAAACGAAAAGATTAGCTCTTTTGTTACTTTTTTTGTGGTCTATGTGGCCTTTGTGCGAAAAGCAACTACCCTGG  
GTTTAACTTGTTCAATTATTCTAGTGTTCCTTTGTTCTAGCATTGAGTATGTTTCTGGTGCATAAGACACTCTTCTT  
AAAGGTACTGGGGCCAGTAAGTACTTGTTAGCTTTTTGTTAGGTATATGTCTACCATGATTATGCATATAGAGCTT  
TTATGAAAATTACTTTCACAATTCAGCTGCCCTTTGGGCTTTAAGGAAGCAGTAGCTGCAGCCAAGACTGATTCA  
GTCAGACATTGCCATGACTTTCACTAGACGTGTGCTCCATAGCCACCTTTCTGTGTGTTTCTCTAGGAGGTTGCTG  
TGTGCTAAGAACTTTTTTAAGCCTGTTGCTTGGCTGCCTAATTGAGCTCTCCACCTGCTTCTGTTTTCTGTAG  
[CCATCAGAGGGTCTCGCTTCAG]CACAAAGATCCGGAGTTTTGAAGAAGCGCGAGGTCTGGACCGAATTA

sgRNA 1B

Off target site 2: NC\_000011.10: 112807711-112808876 Homo sapiens chromosome 11, GRCh38.p7  
Primary Assembly

GAATGGTTCCATCAGGCCAGATGGGGCCTCAAAGAGCTGGTCAGCTGGACACCCTCTGACTCCTCCCTCCCCA  
TCCCTGTGCTTCCCTGGACCTGGGATCAAACCTATTTTCAGGGCAAACCTTGCAAGGGCTCCAACTGGGAGAGAG  
CGGGTGGGAGGGAGGTGCAAGAAGAGAGGGCACTTTGCTGTTTACAGCTAAGCCCTGGTGTCTGAAAGCCTCAA  
ACTGAAGACATCAATAATTCATACATTCATATGCTGTAGAGTATTTCCCTTTTGTACATATCTGGCCAATTGATTT  
CCCTTGGCCACAAACCTGCTGCTTTTAGAACATCATTAAATAACAAGTCAACTGGTAAAATCTTCCCTGGGAGAGGG  
GGCTTTGGTTGGGAGAGGTTCTGACCTTGTTTCCCCAAGAAAAGGGGCTGTGAGCAGCCCTGGCAGCAGAATG  
TATGCACATGGGCTGGGAGCCTTCCCTCCTCTGTTTTAGTGGAAGAAGGGACTGGGGGCCAGAGAGATGAGATG  
CCCACCCTATGGCCTCCCCAGG[CTATTGCTGGAACCCTCTGATAG]GGTTACAGGGAGAGAAGGAAAGAGAGAG  
AGAGAGAGAACTTGGGAGCCTCAGAATAAGAATACAGGTTCTAATGGAACCCTCTCTAGCAGCCTCCTCCTCCCC  
TCCTCACCCAGGTTCTGTCTCTGGGGGTTCCGTGTCTGATCCTCAAGTACCACGGGATGAAACTAATCAGGGGC  
TCTGGAATTAACAAGAGCTGGGAGCCCATGGTGCAACCTGGAGCTTCTACCAAAGCCTCCCTGCACCTCGTCAG  
GGAAACCAGGAGGCCACCCAGCTGAGGCCCTTTGGAGTGGCAAATGGGGCAAGGGCATCTTTCCTGCTGGCT  
CCATTCCCTGAGCCCTTCCATGGCATCCGGAGCCCAGATTGTCCTCCTTCTGCTTCTGTGAGTCCCTGGACAGC  
ACCTGGCTCGTAGGGAATGACCCTTCATGGATACTACAAGAGACTTGTTGAAAGAGTAAATGAAAGCGGAAAGG  
AACTGACAACTCATTACAGTAAGTAAAGTGCTGCCACTTCTCAGGACTCTGGGTTTACAGAGACTCAAAGGAAT  
GAGTCTCTACTGGTGGGATGTCAGCAACTTGGGA



sgRNA 1B

Off target site 4: NC\_000010.11: 90729730-90730789 Homo sapiens chromosome 10, GRCh38.p7  
Primary Assembly

GCCTTAGCCAATTTGCTCATAAATCAAGGATTACCTGTATTTCAAATAATCACTGAATACCTCAAGAGGGAAGCTTC  
TTTCTAAATAATTCAGGTTTAAAAGAATCAGTTCAACCATTGTGGAAGTCAGTGTGGCGATTCCCTCAGGGATCTA  
GAACTAGAAATACCATTTGACCCAGCCATTCCATTACTGGGTATATACCCAAAGGACTATAAATCATGCTGCTATAA  
AGACACATGCACACATATGTTTATTGCGGCACTATTCACAATAGCAAAGACTTGAACCAACCCAAATGTCCAACA  
ATGATAGACTGGATTAAGAAAATGTGGCACATATACCCATGGAATACTATGCAGCCATAAAAAAGGATGAGTTC  
ATGTCCTTTGTAGGGACATGGATGAAATTGGAATAGTCATTCTCAGTAACTATCACAAGGACAAAAACCAAACA  
CTGCATGTTCTCACTTATAGGTGGGAATTGAACAATGAGAACACATGGACACAGGAAGGGGAACATCACACTCTG  
GGGACTGTTGTGGGGTGGGGGGAGGGGGGAGGGATAGCATTAGGAGATATACCTGATGCTAAATGACGAGTTA  
ATGGGTGCAGCACACCAGCATGGCACATGTATACATATGTAACCTGCACATTGTGCACATGTACCCTAAAC  
TTAAAGTATAATAATAATAAAATAAAAAAAGAATCAGATCTTATTAACCAATCAACATGACCCTAGGTTTTAGT  
AAAGTGATCAATTGCTTTTATTTTATATTTTTTATTCCTTTGTATCAAGTCACCTATAAATCTAGGCATGTAAAAATAT  
GTAGTTCTCTTCATGTTGTCAGAAGTGTCCAGATGGTTTGACGCCTTACATGGAAAGAAAATCAGCAGTTAACTT[C  
TAAAGAGGGAACCCTCTGGGAG]CAGATCAAAAATAAGAATGTTGTGTTAAGGGGAATTTTTTGGCTAAGGACT  
AGATTGAGAATTAGAAGAGTAAAAGAAATTTAAAGGTGTTTTCCCAAATAAGCTGCAAAGGCCAACATCCT

sgRNA 1B

Off target site 5: NC\_000023.11: 151153829-151155455 Homo sapiens chromosome X, GRCh38.p7  
Primary Assembly

TCCGTTCCATCTTTTGGGAGAGTGCCAGAGGCACACATCTCAGAGAGTCGTGACTGTGTGCATTATGTTCTCGTCA  
GCACAGATGATTCAGTCAATGTATAAGCAAGCACAGTTGCATTTTATACGACTTCAAATCAGTTCATTTCCAAGTC  
AGAAAAATCTCCAGCAAGTCTGATCACCACACACAGGGCAGCAACCAGTTCTAGGGGCTTACCTGTTAAGAT  
GATTTGGCTTGTTTGAAGTCATTTTCAGAGAACAAGAGAGACAATCTCCCACTACTCTATAATTAGAGTGCTGG  
GGGCAGGCTGGGGGAAGACAGCATGAACATGGAGCTCTCATTCTTATTAGGAGCGTCTCTAATTCACACGGCC  
CTGGGGACTGCTTCAGATGTAATATTCTCTCCACAAAGGATGGAAATCTTTTCTTTAAAACGTCTCATCGCTGCAA  
CTTTGCTGTAAGGCTTCATCGGATAAGTGTATAAAAAATCCAAAACCTCACCTGTTTTCTTATTTTCATCCAACCTTTTT  
GTGTTTATATAATTAAGCACACCCTGCTTGATTGGTGTGTGTGGGATGTGTGTGTTTGTGTGTGTAATCTTAAA  
GGACTCAGAAGTTGGAGTGTCGTGCGCTTATCACAGCTCCACGGACTCTATGTAATCATTTAGCTTCTTGAGGCTT  
TTGCTGCCCTGTGATTTTCAGAAGTGAGTGTCTTCATCACTCTTGAACCCCAATGCCTGAGGCAGGGAGGC  
AAACTACTGGACTTTTGGTAAATGACAATTTTATTCTGCAACAATTGGGTGGGAATATTCCAG[CTTCCAGAGGGTT  
CCCACTTTCC]TGGTCTGTAAATGGAACCAAGCCTACCTGCGTATCTTGTGTTGGGAGCTTCAGACTCTGCAGCAG  
TTAAAGCCTTCATTTTTGGTCTTTACTTAACCACCCATAAGCTTCTTGTCTGTTCCCTGCTCTTCTCCAGTCCTTGC  
CTTGATCATTATTCTCTATACCTCAGACCTCTGCCAACCTAAAGAGAAGCCTGTCTGGGGCCTTGCTTTGTTTT  
TCCCTGTGTTTCTAACCCCAAGATAGGGCCCCGGAGCACGCAAGAGACTTGGGGCTGAATGAACGTAATTGACTT  
GCTTGGATTCCCTGCACAGGTGACTGGGATCAGATCATTTTCCTTCTCAGAGACCTAGTTGTCTCACTTGTACAAGA  
AGGGACTAACCTGGATGACTTCTGAAATCTTTATTTTTGAGAAGAGGATTTTATAATTCTATGAATATTTTGTATTT  
TTCTATATTTATTCACTTATCACTTTCTTCTTTCCATTCTTTCTAGCACAGAGGAAGGGGAACAGCGAGAAACAACCC  
CCAAACAAGTGAACCCAAACACTAGTTCCTCTCTACCTTCTAAAATCATATTTTCTCTGTTGTACAATGGTTGTTT  
TTTTCTATCTTATCAAGAGTCATCCGTTCAAGTGATTTCAAGATGACTAATGGCCAAGTTGGTTGTTTCATGCTGTA  
CGCTCCTGCTGCTGGAAGTGAAGTGAATAATACTCTCCACGTCACCAATCTCATTTTTTTCTGACGTAC  
TGACTGACCCCT

sgRNA 1B

Off target site 6: NC\_000001.11: 6052625-6053681 Homo sapiens chromosome 1, GRCh38.p7 Primary Assembly

CTCTGCTAGCCACCGTTCTCTGGCTGGTGTAAATCCCTCTCAATTGCAAATTGACAGCTTTATCTTCTGGCCTCTCAG  
GAACATGCCCTTGTGAGAGCCATTAGCCAAAGAGGACCCTCCCCACCCAGTCCTTGTAGAGTTGCCAGTTAAATT  
TGAAGTTCAGATAAACGCGTAACTTTTTAGCATAAATACGTTCCATGCAATATTTGGGTCATACTTATACTAAAAAG  
TTCCTCATTGTTTATCTGAACTTCAAATTTAACTGGGCGTCCTGTGTTTTATCTGGCAACTAAATATCTGGCTTCC  
GTCTGAGACAGACCCTAGGGATCATCTGCGTGCTCTGTGCAGAGTGGAGTGCAGGCCAGGACCGCTCCTTTAACG  
TTTTCTCCTGTGGACGGCGTGTGGTTCCTCAGCCATTGTTTGAATATGTGGTTGTAATTTAGAAACAAAACACT  
TCTCCTGTGAGTCCATTAGATGGCAGTGTTCCTCAGGCTTTGTATCCTAAATCCAGCTGTAAAGGAAGGACAAAGG  
GTCCGCTAGTTTGGCCACAGCTGACCTCCTTGTCTGCTGGAAATTTCTCAAGAAGGAGACGCTGGGCATTCATGA  
GGGGCTGGTCATTGATTCCTTTTGTTCATTAGTAAATGTTTATTGAGAGTCTGCTTGGCACCAGGCGCTGAGCCA  
GATCCTGGAGCTGCTGCATGAACAAGAGCAACCAGGTCCCCAACCTCACGGCAGCCATGGCCTGGGGGTGTGGG  
GGGCAGAGAAGCAGCGAGCTTGCACGGAGACAAGTTCCAACAGCGACCACTGGCCGAGGCAGCAAAGCAGGAC  
AATGCAATGAAGAAAGACCAGGGAG[GCCGAGGGGGAACCCTCTGAGAG]AGGGATCATCTGAAGATGTGGAGA  
ACATTCCAGCCCAAGAGGAGAGGGGTCTGGAATGGATGCCTCTCTCAGCTGGAGGAGCGAAGAGAAGGCCCAGG  
CGGCTAGGCTGGAGGGAGGAAGGTGGAGGACACAAGGCGATGATGCAGGAGGGGCCAGACCCCATCCTCCAAA  
C

sgRNA 1B

Off target site 7: NC\_000023.11: 55279910-55280619 Homo sapiens chromosome X, GRCh38.p7  
Primary Assembly

GGTGT CAGGAGAGCTTGTGGTCTAGGTTCTCCACAGAGGCAGGAAAACCTTCAGTCACGTGGTGAATGCCCCACTC  
AGTGCGCATGCTGCACAGATCTGTTACTGCAGATTTCTGTTGCTACGCATGTCTGTTACGCATGCGCCTTGTGCCT  
ACCTTCTGTCCATGCAGAGCTTTGTGAGAAGAGGTAGTATCTTCATTCTTTCCACCATCTTGATTCTTCTCTGAC  
TGAGGCTCAGCCGGTAGGTCCGCAGAGCGGTCTTCTGGAATTTAGTTGTGAGTGAATGTGAGGAGGAGCCAG  
CGGGCTTTGGACAGGTCTGCGGCACAGTCTTTGGCTTCTGAGGGAAAGGGGCCTCGCAGTCGTCTCGGCTCC  
TCCCAGGTCGCAATGCTGCTATGGGCCTTGACGTAGTGGCTAGGCTGGAAGTGGGAGGAAAAGTGGGCCGAGA  
GGGGAGGGATCACGTGAAGATGGGGCGAGTGTGGAGGTGCTGTTAGAGGTATCTGAGTCC[CGAAAACCTGGAA  
CCCTCTGAGAG]AGGACAGTTTCCAGACTCCTCAGTAGGGACGCGGGAAGGGATGGTGAGGTCGGCAAGGAAGG  
GGCCTGGGAACTAGGAACGCTGTGGGCTGGTGACTGCGGCCCTGAGGTCTGTAGAGTGCCTGGCAGAGGTGTCC  
CGTGAGGAACATAAACTCCCTCTGTGTCGCAACTTC

sgRNA 1B

Off target site 8: NC\_000006.12: 61930823-61931624 Homo sapiens chromosome 6, GRCh38.p7  
Primary Assembly

GAGTTGCCTGGAGGAAGCTAAGTATCAGGCTTTAGTAGAGCTCTGTTTCATTTAAATGTTAAACCTAATACCACATT  
TTTTACTCAAAGAAAGATTATTCAAATTTAACAACTGCAATTTTTCTACTCAGGTGGATAGAAATATTCTGGTGACA  
ATTTTTGTTTCAAATAAGCAACTCTTCTGCATATGTAATAAAATACCACCTAATTTTACATAATAATGTGAATCAACA  
AAAAATTCAATCATATTACACATATACAATAAAATATTTTTATATTCATCCTTATAATGAAAAAAATACTTATATTTT  
GTTAAAAATATAAGAAGTTTCATCCAAAATACTACTTACGCATCTTCACTGAAAATCACTATAAGAAAATAGGGCTT  
GATTCCTTACATACTACATGAAAGGAGCTAAATAAAATTGATTTAGAGTATATGTTT[ATAAATCCGTAACCCCTCTG  
AAGG]TCATTTACTGAACTTTCAGGTAACCTAACTTTTTATAAAGTTGGAAGTTTTATAAAGATGAAAGTATAG  
TATTACCCAAAAGAAAATAAAGAACTGAAATGTTGGACTTAAAACTATATAAAATATTAAGATGTTAAGAAT  
ATATACATACACACATATATATGTGCTAAAGATATATATACATAATCCTTAACACTTGATAACATATTACTTA  
TATAAAAATATACAATATTCAAAGAAGAATTTAAGTGGTTTTATATGCTCATTATTAGTAATAAAGCTTTAAATAT  
AATTTTATGCTTTTGAGAGAGTATTGCAAAT



sgRNA 1B

Off target site 9: NC\_000010.11: 18772978-18774019 Homo sapiens chromosome 10, GRCh38.p7  
Primary Assembly

AGCTGAGGAGGGTACTGAGGTGGGAAGACAATGGAGAGAGGCTTTCAGAAGGGAGGGGAAGTGTTCGCTCTCCA  
TCCTTGAGGCTGCAGATGATAGAGAATACCTGCCTTCTGGGACAGTGGAGGGGCCGGAGTGATTGGGGTGGAA  
CTTCCCCTGCCATTCCAAGGGCCTGAGGTGAGGGCATGGGCAGAACTCCAAGGTGCCACCTCCACAACAATAA  
AGTGATTCCTTCCTTCAATCAAACAGACCCAATTACTGGGAGGAAAAAACCAAGACATTCTAAACCAAGCCGTTT  
GACAGGAGAAAGTTAAAATAGTCACCATGTCACTGCTGGA[GTCAAGCCTCAACCCTCTGACAG]GTTTTTAACAG  
GTGAAATCTATTCCATTAGTAATCCCTATAGGACACCATGACAGCTGCCTGAGCTCCCAGTCCCAGTGTTCGCT  
ATTATTTTCCTGAGGCCCGTTGTTTTCTTAGGCCCCAGATACAACTGGGATAATCAACAACTAATTTGTCCC  
CTTTTCGTGAACTCCCCAGCAGAGAATTACTCCACTTTTTTCAGCTCCAAGACTGCCTTATCTGAAAGATGCTAA  
TAGGATGGCATCTGCGTAGACAGGGATCATAAATATTAGATCAATCCATGTAGTACTTGTTATGTGCTTAGCTG  
TGGCTCTGACAAAAGATGAGTAAACATAGTTGTAATCCTCAGAGAAACAGGGTAATTGTTTGTGGGGGAAATG  
AGGAGATGCTAAAAATTAAGCATGAAGGACTCTTATGTTTACAGGAGAATTCTACACCAAACGCTAAAATTCAG  
GGAGATACATAGCAAAGGACCCAAATGGGCCCACTAGAGAAGGAATTTTAGTATATATGTGTGGGGTAAGTCAG  
ATCGGTGTGGGTTTGTGGTAATACAGGAAGGCTTATGAATGAATTGGGACTTGGTCTTAGGAATGAATAGGAG  
TTGGGTCGACAGAGTGGTTGGTGAGAGGACATTCCAGAAGGAGAAGCAGGACAGCGAGTGT

sgRNA 1B

Off target site 10: NC\_000008.11: 51422814-51423616 Homo sapiens chromosome 8, GRCh38.p7  
Primary Assembly

CCTTCAATGCCTCTCCGTGTAGAGAACACACCAGGCAATCTTAACAGCCTGTGTCCACTTGTAATAACCTCAGCTG  
AGTTTCAGTACAGTCTACTCAAGTCTGCCTACAAATGGACTCTCCCATGTCCCTTGGAAGTGAATAATCAAAAAA  
GAAAAATATATTTTTATAAGACTACAGTAAACAGTATTTTAAACAGTCATTATATATAATCAA[CCTGCAGAGGG  
TTCCAGCTATAT]AACCAGATTGGTGATAGAATGTAAAAAGCTATGTCAATTATGTTGGCCAATTATAAATGCCTGG  
AAACACTGAGATATTTGTTCTAGTGGTTGTAAAGTTTACTTGGGAGTTTGATGGATTGATTTCTAATTTTAAACTGG  
GATTAATATACTAGGCTAGAGTATGTAGTACATGTTGAATTCCATATTATGCTTCCACCTCCGGCTCCACATTTTG  
GCTATAAATACATCTTGCACTTCTATTATTTTTGGTTTGTAAGAAAACATGATATATATTTGCAAATCTTTGCTATTTAT  
GTTCTTTTTTTAATTTGTTATTTTCACTTTATATCCTTTAAGATTGTTTATTTTAAATTTTTTTATTTTAAAAAGAATA  
AAACAGCTTTGACTATAAACACACTTGACCAGAAAGAAAGTATAAGAGAGCATGATTAGTGAGATCAGTCAAATA  
GGATTGGGGTAGAAGCTGTTCAAAGACAGTTATTTGGATGTTGTAATGGAGCTATAGACACCTACCCGTGACTG  
TAAGAAACATGTTGGTCACAGCAAGGCCAAAAG
